# Supplementary material
Source: PubMed Central journal article supplement (PMC2599834)
Supplement: 108.136697_1.pdf [file 108.136697_1.pdf]

# Supplemental Information ( High resolution approach to the native state ensemble kinetics and thermodynamics)

Sangwook Wu,Pavel I. Zhuravlev,Garegin A. Papoian<sup>1</sup>

<sup>1</sup>Correspondence should be addressed to GAP. Email: gpapoian@unc.edu

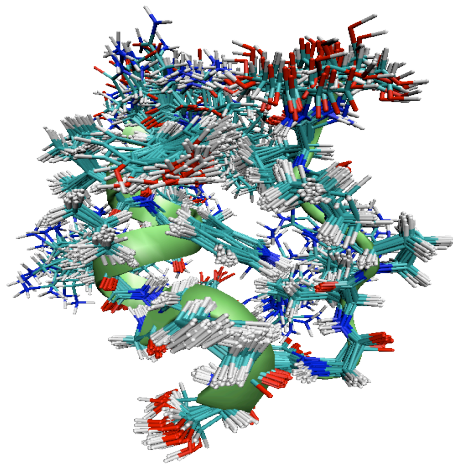

Figure 7: 38 NMR structures for Trp-cage superimposed.

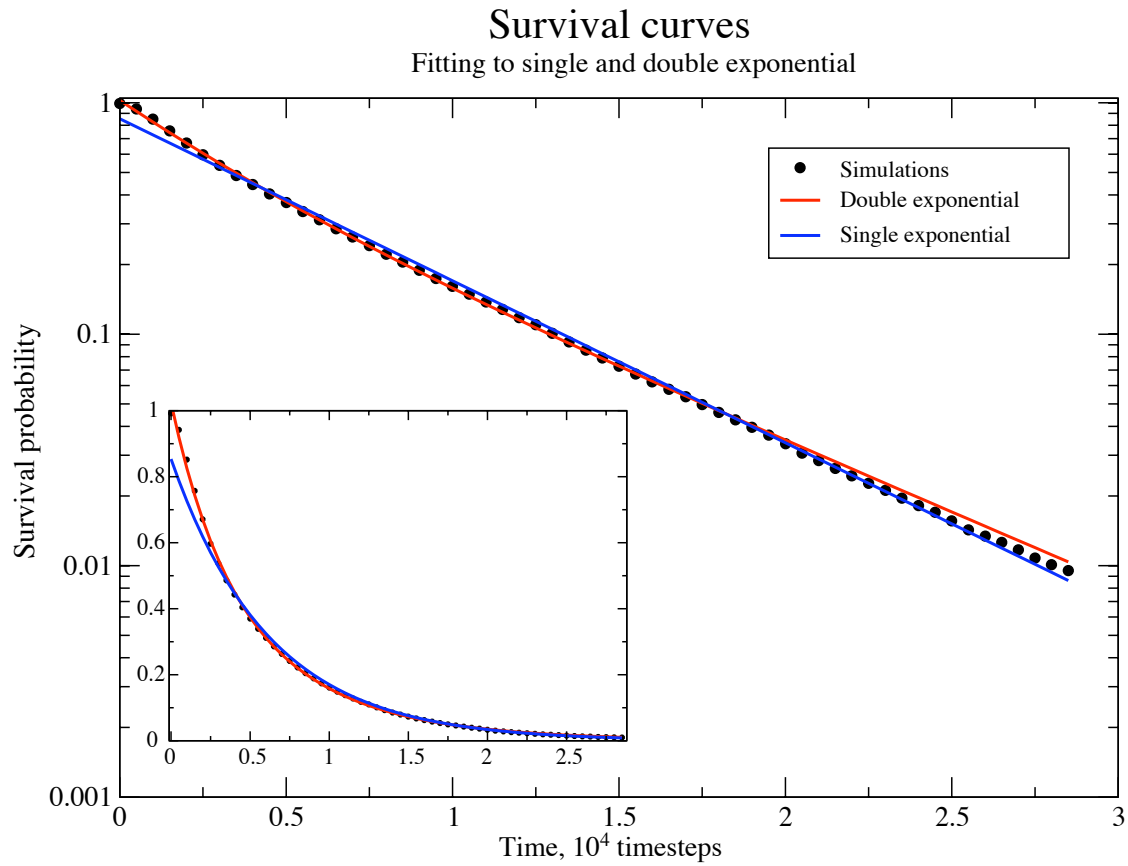

Figure 8: The survival curve (the probability that the "37" to "1" has not yet occurred after time  $t$ ) fitted by a single (blue) and double (red) exponential. Inset shows the same plot on linear scale.

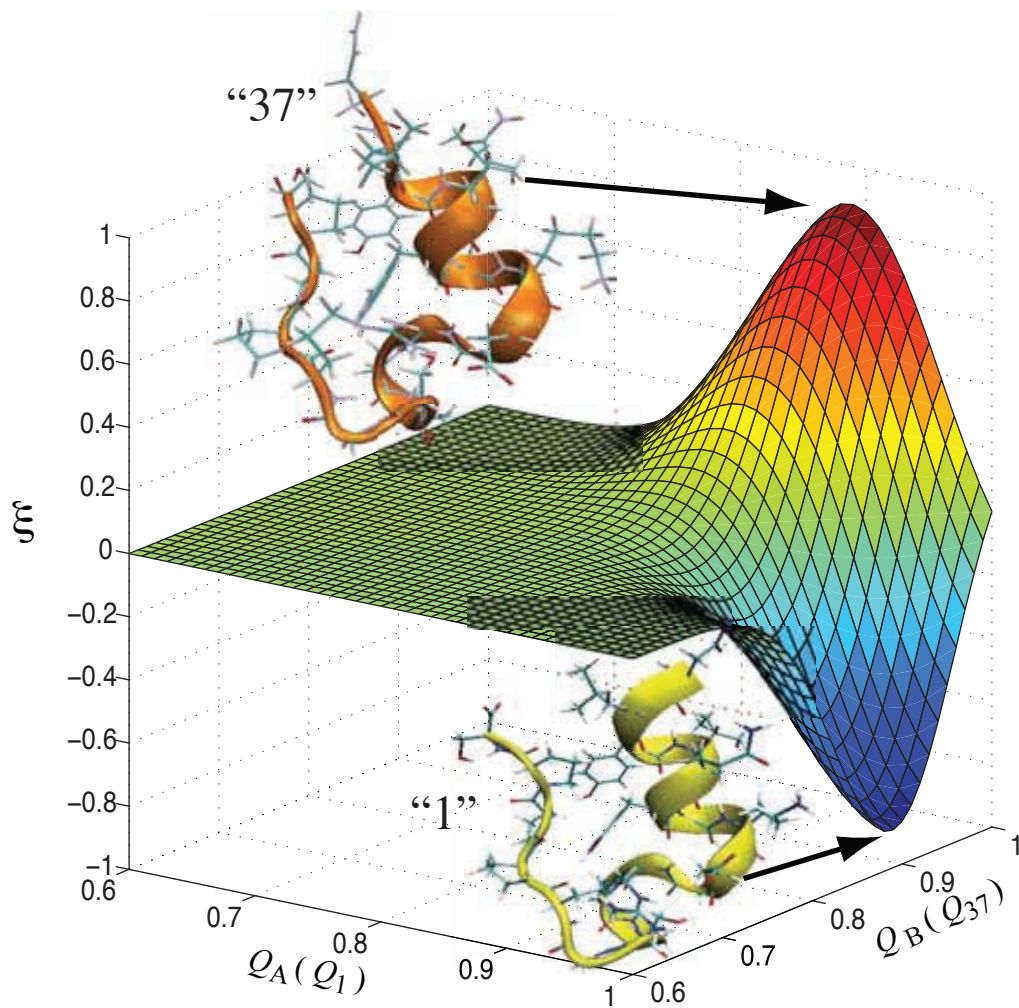

Figure 9: 1D order parameter, the sum of positive and negative gaussians centered on models 37 and 1 respectively.

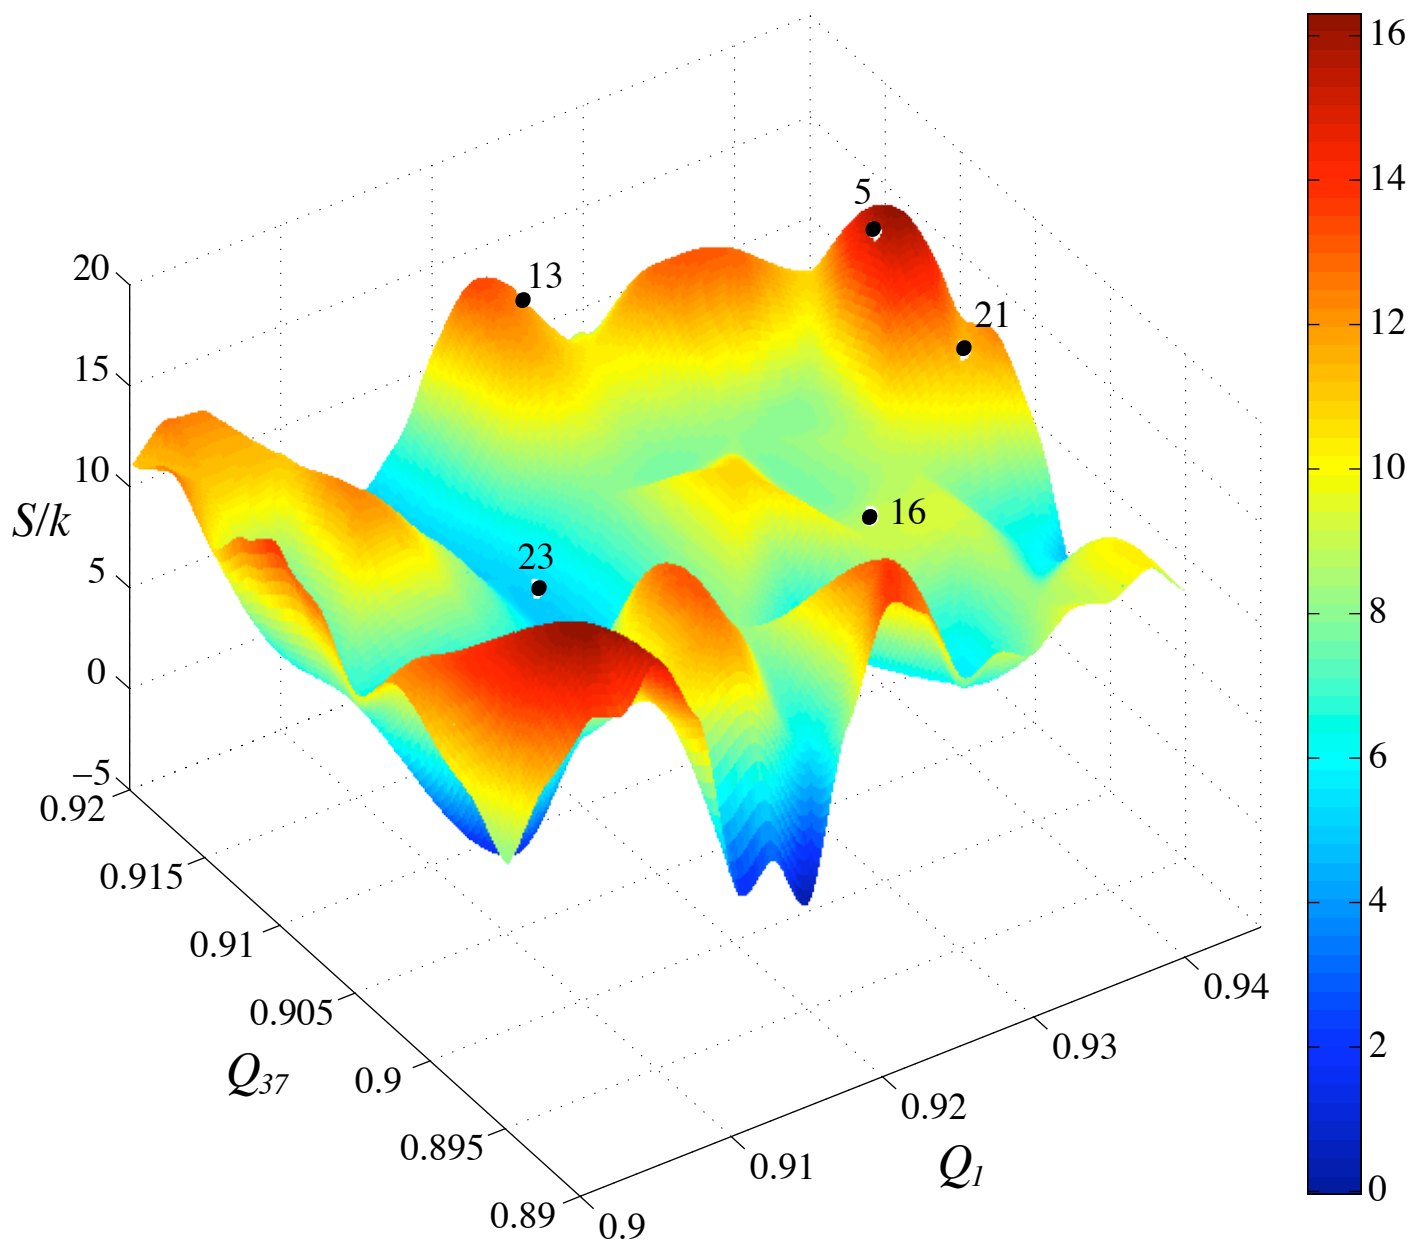

Figure 10: Rugged entropy landscape around model 16 location spans 16 entropy units. The average energy landscape is very similar. Corresponding contributions to free energy is 10 times larger than change in free energy itself.

| $(Q_1, Q_{37})$                    | SASA of HP core | SASA of the whole protein |
|------------------------------------|-----------------|---------------------------|
| Model 1                            | 955             | 1888                      |
| Hydrophobically favorable region   |                 |                           |
| (0.907, 0.807)                     | 975             | 1943                      |
| (0.905, 0.809)                     | 975             | 1952                      |
| (0.901, 0.802)                     | 969             | 1931                      |
| (0.900, 0.808)                     | 964             | 1901                      |
| Hydrophobically unfavorable region |                 |                           |
| (0.774, 0.762)                     | 1089            | 1936                      |
| (0.772, 0.763)                     | 1120            | 1932                      |
| (0.773, 0.764)                     | 1092            | 1920                      |
| (0.773, 0.761)                     | 1038            | 2027                      |

Table 1: Solvent Accesible Surface Areas for several structures ( $\text{\AA}^2$ ) indicated on Fig. 6.
